# Supplementary material for: Concurrent Use of Stimulants and Second-Generation Antipsychotics Among Children With ADHD Enrolled in Medicaid
Source: Atypon-hosted journal article supplement (doi:10.1176/appi.ps.201300391), 2014-12-17
Supplement: appi.ps.201300391.ds001.pdf [file appi.ps.201300391.ds001.pdf]

**Appendix A Flow-chart of Study Sample Selection and Study Cohort Development**

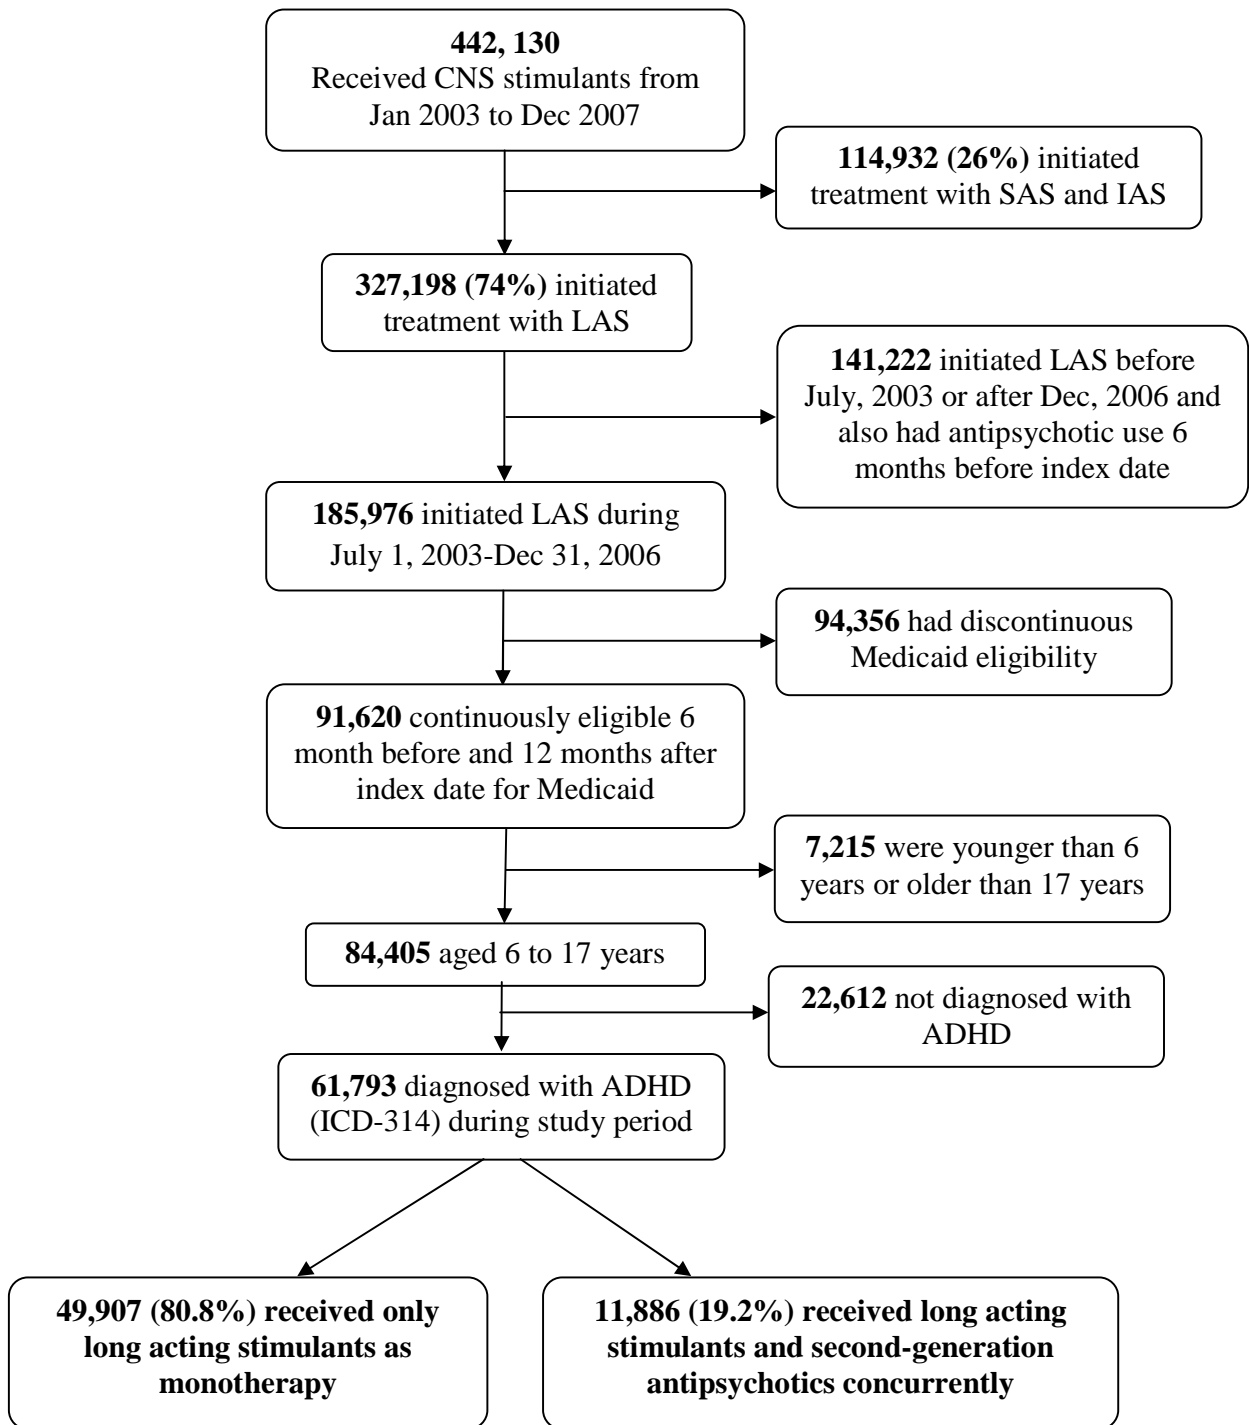

Abbreviations: ADHD – Attention Deficit/Hyperactivity Disorder; SAS – Short acting stimulants; IAS – Intermediate acting stimulants
